# Supplementary material for: Human Monoclonal Antibodies Targeting Nonoverlapping Epitopes on Insulin-like Growth Factor II as a Novel Type of Candidate Cancer Therapeutics
Source: Oxford University Press journal article supplement (doi:10.1158/1535-7163.mct-12-0172), 2012-05-03
Supplement: 15357163mct120172-sup-figleg.pdf [file 15357163mct120172-sup-figleg.pdf]

**Supplementary Figure 1.** The amino acid sequences of m610.27 (A) and m630.3 (B) in alignment with their corresponding germlines of human antibody V genes and/or wild types. The complementarity-determining regions (CDRs) and framework regions (FRs) are indicated according to the ImMunoGeneTics annotation (<http://imgt.cines.fr/>). The somatic mutations in the V regions of the antibodies and the mutations induced by random mutagenesis are highlighted with gray background.

**Supplementary Figure 2.** Schematic representation of antibody structures and SDS-PAGE analysis. (A) Fab m610.27 was converted to a standard IgG1 format. (B) m630.3Fc was constructed by joining eAd m630.3 to the N terminus of human IgG1 Fc through a hinge linker. (C) The bispecific antibody, m660, was generated by fusing scFv m610.27 and eAd m630.3 to the N termini of the heavy and light chain constant regions of a human IgG1, respectively, via a linker composed of three repeats of the G<sub>4</sub>S motif. (D) Reducing and nonreducing SDS-PAGE of the antibodies purified from 293 free style cell cultures.
